# Supplementary material for: Role of Cassava CC-type Glutaredoxin MeGRXC3 in Regulating Sensitivity to Mannitol-Induced Osmotic Stress Dependent on its Nuclear Activity
Source: Research Square preprint supplement (doi:10.21203/rs.3.rs-469805/v1), 2021-05-13
Supplement: Supplementary file 2 [file fb83e06ec856437b384deb20.xlsx]

## Sheet: GRX
primer name	sequence (5'→3')
AtERF1 PF	ATCCTCAACGACGCCTTTCAC
AtERF1 PR	TTGACCGGAACAGAATCCACC
AtERF6 PF	CTCGCGTTACTGTTCAATCC
AtERF6 PR	TCTCCTCTGCTGCTACAACC
AtGA2OX6 PF	ATACGCACGGTTAGAGATTTGG
AtGA2OX6 PR	ACTTCGCTAGACTTCTGTCCCC
AtPDF1.2 PF	ACCCTTATCTTCGCTGCTCT
AtPDF1.2 PR	ATGTCCCACTTGGCTTCTCG
AtWRKY33 PF	CTTCCACTTGTTTCAGTCCCTCT
AtWRKY33 PR	TTGTTGTTGCTCTTGTCTCCTTC
AtWRKY40 PF	TCAGCCCTCCCAAGAAACGC
AtWRKY40 PR	CTACTCTCCGACACTCCGCC
WRKY53 PF	CGTCGTCATCATTTTCATCAC
WRKY53 PR	GCAAACTCTTCACTTCTCGGA
AtACT1 PF	GGGCAAGTGATCACCATTGG
AtACT1 PR	TGGAGCCAAAGCAGTGATCTC
